# Supplementary material for: A Traditional Korean Diet Alters the Expression of Circulating MicroRNAs Linked to Diabetes Mellitus in a Pilot Trial
Source: PubMed Central journal article supplement (PMC7551128; doi:10.3390/nu12092558), 2020-08-24
Supplement: nutrients-12-02558-s001.pdf [file nutrients-12-02558-s001.pdf]

Table S1. MiRs used for the validation.

| <b>miR</b>      | <b>Accession number</b> | <b>Sequence</b>           |
|-----------------|-------------------------|---------------------------|
| hsa miR-25 3p   | MIMAT0000081            | 5'CAUUGCACUUGUCUCGGUCUGA  |
| hsa-miR-148a-3p | MIMAT0000243            | 5'UCAGUGCACUACAGAACUUUGU  |
| hsa-miR-126-3p  | MIMAT0000445            | 5'UCGUACCGUGAGUAAUAAUGCG  |
| hsa-miR-18a-5p  | MIMAT0000072            | 5'UAAGGUGCAUCUAGUGCAGAUAG |
| hsa-miR-107     | MIMAT0000104            | 5'AGCAGCAUUGUACAGGGCUAUC  |
| hsa-miR-26b-5p  | MIMAT0000008            | 5'UUCAAGUAAUUCAGGAUAGGU   |
| hsa-miR-374a-5p | MIMAT0000727            | 5'UUAUAAUACAACCUGAUAAAGUG |
| hsa-miR-26a-5p  | MIMAT0000082            | 5'UUCAAGUAAUCCAGGAUAGGCU  |
| hsa-miR-31-5p   | MIMAT0000089            | 5'AGGCAAGAUGCUGGCAUAGCU   |
| hsa-miR-200a-3p | MIMAT0000682            | 5'U AACACUGUCUGGUAACGAUGU |
| hsa-miR-17-3p   | MIMAT0000071            | 5'ACUGCAGUGAAGGCACUUGUAG  |
| hsa-miR-92a-3p  | MIMAT0000092            | 5'UAUUGCACUUGUCCCGCCUGU   |
| hsa-miR-193a-5p | MIMAT0004614            | 5'UGGGUCUUUGCGGGCGAGAUGA  |
| hsa-miR-19b-3p  | MIMAT0000074            | 5'UGUGCAAAUCCAUGCAAAACUGA |
